# Supplementary material
Source: publisher figshare collection journal article supplement (https://tandf.figshare.com/ndownloader/files/18025949)
Supplement: Supplementary file 1 [file 18025949]

**S1. The case number of included trials**

| Study | Year | Pessary group number total | Control group number |
| --- | --- | --- | --- |
| Karbasian | 2016 | 71 | 73 |
| Nicolaides | 2016 | 201 | 217 |
| Saccone | 2017 | 133 | 125 |

For Karbasian 2016, they included 144 patients.

For Nicolaides 2016, they included 465 participants in the pessary group and 467 participants in the control group., there were 201 patients combined with progesterone therapy in the pessary group, and there were 207 patients used progesterone therapy in the control group. These data are in the Supplementary Appendix, available at NEJM.org. So, we extracted 408 participants in Nicolaides 2016.

For Saccone 2017, they included 150 participants in the pessary group and 150 participants in the control group. There were 133 patients combined with progesterone therapy in the pessary group, and there were 125 patients used progesterone therapy in the control group. These data are in Supplement 2 of the article. So, we extracted 258 participants in Saccone 2017.

The total number is (71+73) + (201+217) + (133+125) = 820.
